# Supplementary material for: Human ApoE2 Endows Stronger Contractility in Rat Cardiomyocytes Enhancing Heart Function
Source: MDPI journal article supplement (doi:10.3390/cells12030347), 2023-01-17
Supplement: s1 [file s1]

## Supplementary materials for the paper: Human ApoE2 endows stronger contractility in rat cardiomyocytes enhancing heart function

Yang Wu<sup>1\*</sup>, Fujie Zhao<sup>1</sup>, Venkata N. Sure<sup>1</sup>, Abdulgafar Ibrahim<sup>1</sup>, Changjiang Yu<sup>1</sup>, Sean M. Carr<sup>1</sup>, and Ping Song<sup>1\*</sup>

<sup>1</sup> Center for Molecular and Translational Medicine, Georgia State University, Atlanta, GA 30303, USA

\* Correspondence: Yang Wu, [dawn0722@gmail.com](mailto:dawn0722@gmail.com), 1-404-775-3434;  
Ping Song, [psong@gsu.edu](mailto:psong@gsu.edu), Tel.: +1-404-413-6636.

**Table S1. Summary of antibodies.**

| Name of antibody          | Company                       | Catalog #  | Stain/blot         | Source | Dilution for WB | Dilution for IF |
|---------------------------|-------------------------------|------------|--------------------|--------|-----------------|-----------------|
| CF555-WGA                 | Biotium                       | 29076-1    | Cell membrane      |        |                 | 5µg/ml          |
| DyLight™ 554 Phalloidin   | Cell Signaling                | 13054      | F-actin            |        |                 | 1:200           |
| ATP5A1                    | Proteintech                   | 66037-1-Ig | Mitochondria       | mouse  |                 | 1:150           |
| AF 488, donkey anti-mouse | Invitrogen                    | A-21202    | Secondary antibody | donkey |                 | 1:400           |
| β-MHC                     | Santa Cruz Biotechnology, INC | sc-53090   | 223 kDa            | mouse  | 1:500           |                 |
| ANP                       | Santa Cruz Biotechnology, INC | sc-515701  | 17 kDa             | mouse  | 1:500           |                 |
| β-actin                   | Santa Cruz Biotechnology, INC | sc-47778   | 42 kDa             | mouse  | 1:500           |                 |
| MYH6                      | Abcam                         | ab207926   | 220 kDa            | mouse  | 1:1000          |                 |
| MYL2                      | Cell Signaling                | 3672       | 18 kDa             | rabbit | 1:1000          |                 |
| TNNC1                     | Proteintech                   | 13504-1-AP | 18 kDa             | rabbit | 1:1000          |                 |
| α-actin                   | Santa Cruz Biotechnology, INC | sc-32251   | 42 kDa             | mouse  | 1:500           |                 |
| GAPDH                     | Santa Cruz Biotechnology, INC | sc-32233   | 37 kDa             | mouse  | 1:1000          |                 |
| rApoE                     | Abcam                         | Ab183596   | 35 kDa             | rabbit | 1:1000          |                 |
| hApoE                     | Cell Signaling                | 13366      | 35 kDa             | rabbit | 1:1000          |                 |
| FAT/CD36                  | Cell Signaling                | 14347      | 88 kDa             | rabbit | 1:1000          |                 |
| CPT1B                     | Millipore Sigma               | SAB5700834 | 87 kDa             | rabbit | 1:1000          |                 |
| COX IV                    | Proteintech                   | 11242-1-AP | 17 kDa             | rabbit | 1:5000          |                 |
| Hsp60                     | Cell Signaling                | 2165       | 60 kDa             | rabbit | 1:1000          |                 |
| VDAC1                     | Cell Signaling                | 4661       | 32 kDa             | rabbit | 1:1000          |                 |
| Tim23                     | Santa Cruz Biotechnology, INC | sc-514463  | 23 kDa             | mouse  | 1:1000          |                 |
| Tom20                     | Santa Cruz Biotechnology, INC | sc-17764   | 17 kDa             | mouse  | 1:500           |                 |
| OPA1                      | Cell Signaling                | 80471      | 80-100 kDa         | rabbit | 1:1000          |                 |
| Mfn1/2                    | Abcam                         | Ab57602    | 75 kDa             | mouse  | 1:1000          |                 |
| Mfn2                      | Cell Signaling                | 9482       | 80 kDa             | rabbit | 1:1000          |                 |
| MFF                       | Santa Cruz Biotechnology, INC | sc-398617  | 25 kDa             | mouse  | 1:500           |                 |
| Fis1                      | Santa Cruz Biotechnology, INC | sc-376447  | 17 kDa             | mouse  | 1:500           |                 |
| Drp1                      | Cell Signaling                | 4494       | 84 kDa             | rabbit | 1:1000          |                 |
| CACNA1C                   | Santa Cruz Biotechnology, INC | sc-398433  | 200 kDa            | mouse  | 1:250           |                 |
| RyR2                      | Santa Cruz Biotechnology, INC | sc-376507  | 565 kDa            | mouse  | 1:250           |                 |
| SERCA2                    | Santa Cruz Biotechnology, INC | sc-376235  | 109 kDa            | mouse  | 1:250           |                 |

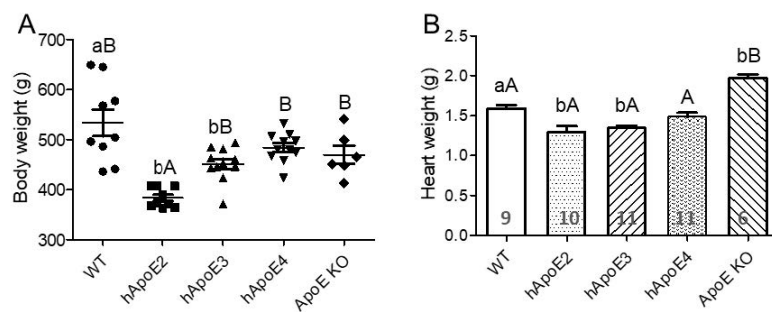

Supplementary Figure S1. Wu et al. Body weight and heart weight of transgenic rats at 6-month age. **A.** Body weight was compared between WT, hApoE2, hApoE3, hApoE4, and ApoE KO rats. **B.** Heart weight was compared between different rats. a vs. b, A vs. B,  $p < 0.05$ . Rats number used for statistical analysis was labeled in bar graphs or indicates by symbols in scatter plots.

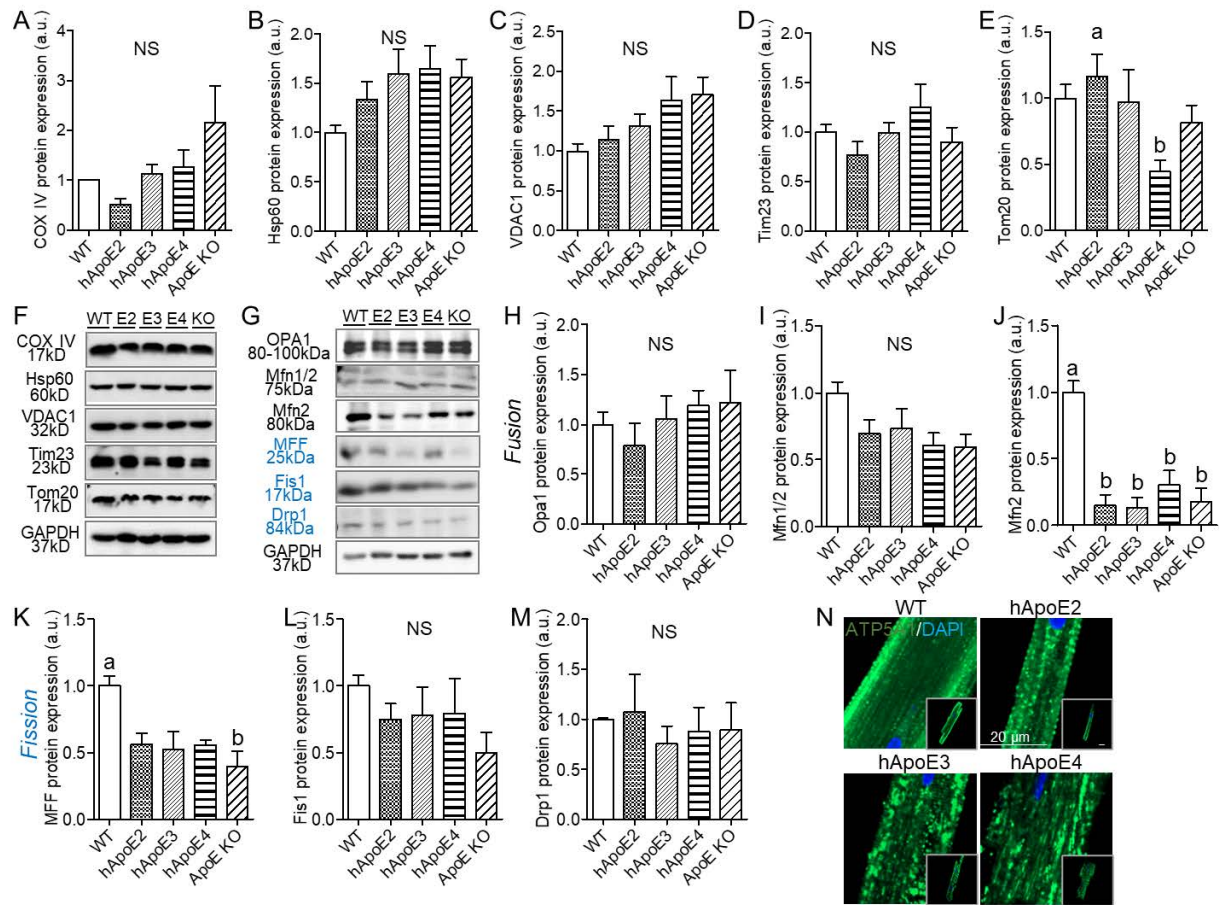

Supplementary Figure S2. Wu et al. Expression of mitochondrial proteins. **A-E.** A set of mitochondrial proteins, including COX IV, Hsp60, VDAC1, Tim23, and Tom20, were detected by western blotting using specific antibodies. **F.** Representative images of mitochondrial protein bands detected by western blotting were shown. **G.** Representative images of western blotting showed the expression patterns of proteins controlling mitochondrial dynamics. **H-M.** The expression profiles of proteins controlling mitochondrial fusion (Opa1, Mfn1, and Mfn2) and fission (MFF, Fis1, and Drp1) were quantified and compared in heart lysates from adult rats. **N.** Mitochondrial ATP synthase (Complex V) was labeled by anti-ATP5A1 antibody followed by a secondary antibody in Green, indicating the distribution of mitochondria in rat cardiomyocytes. Nuclei were stained by DAPI in blue. ANOVA followed by a Tukey post hoc test. a vs. b,  $p < 0.05$ , NS, no significant difference. Six rats per group were used for western blotting analysis.
